# Supplementary material for: Improving Bone Health by Optimizing the Anabolic Action of Wnt Inhibitor Multitargeting
Source: PubMed Central journal article supplement (PMC8101614; doi:10.1002/jbm4.10462), 2021-05-06
Supplement: JBM4-5-e10462-s001.pdf [file JBM4-5-e10462-s001.pdf]

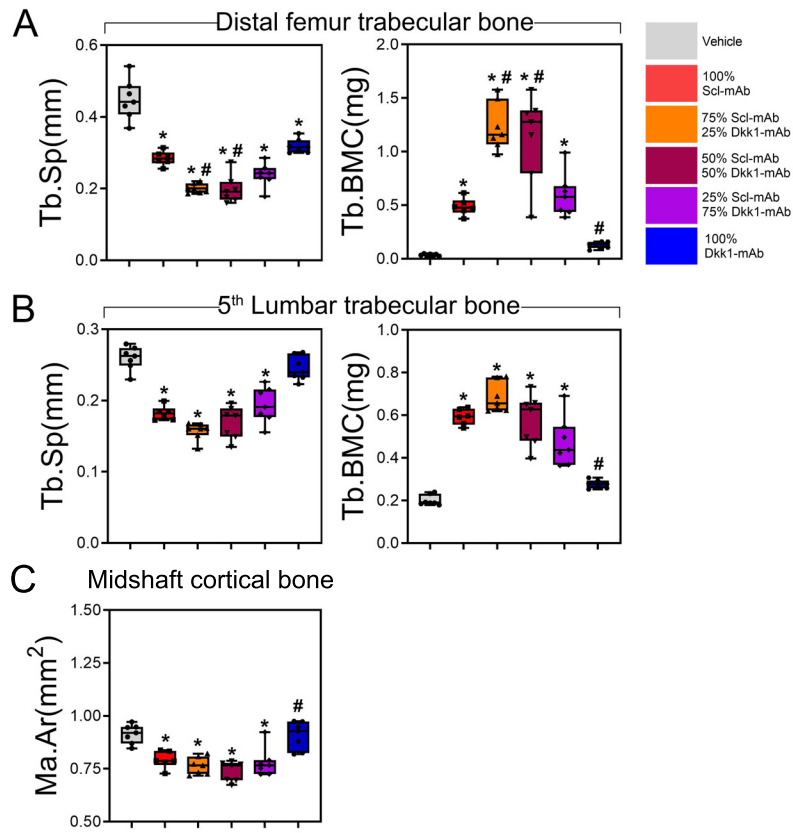

Figure S1

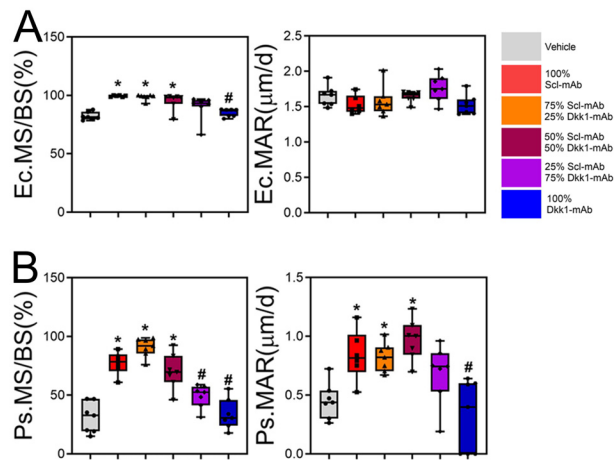

Figure S2

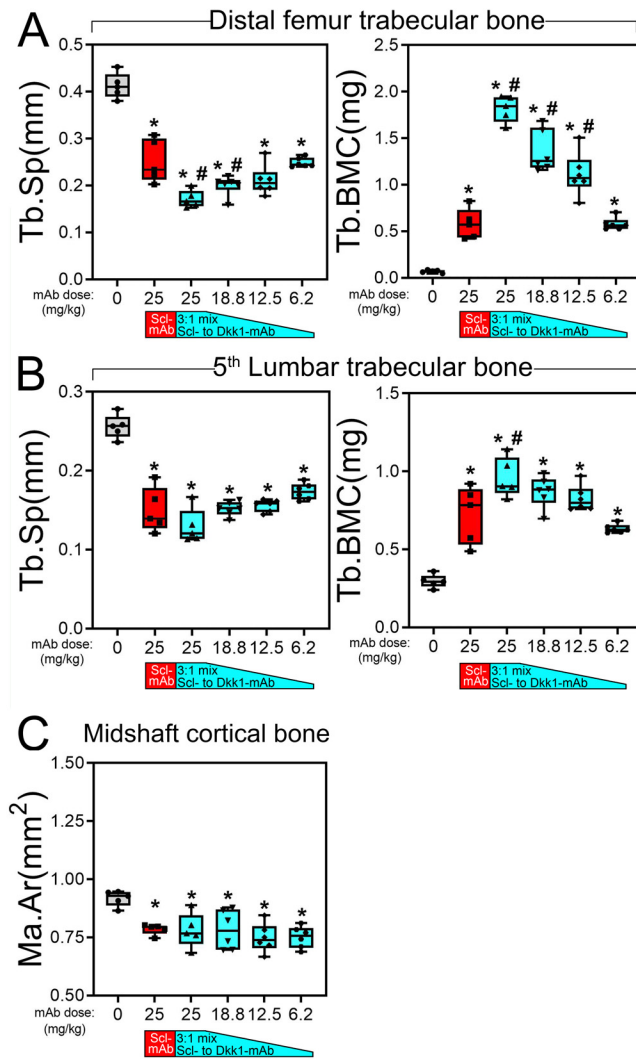

Figure S3

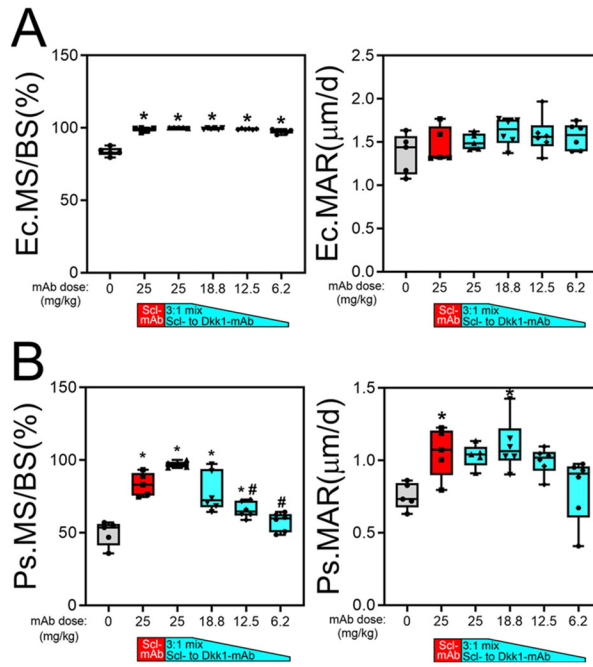

Figure S4
